# Supplementary material for: CRISPR-Cas13-mediated RNA editing in the silkworm Bombyx mori
Source: PubMed Central journal article supplement — Zool Res. 2024 Nov 18;45(6):1249–60. doi: 10.24272/j.issn.2095-8137.2024.105 (PMC11668950; doi:10.24272/j.issn.2095-8137.2024.105), 2024-11-18
Supplement: zr-45-1249-S1.pdf [file zr-45-1249-S1.pdf]

## Supplementary Materials

### CRISPR-Cas13-mediated RNA editing in the silkworm *Bombyx mori*

Yao-Hao Tang<sup>1,2,#</sup>, Xing Zhang<sup>1,2,#</sup>, Zong-Cai Dai<sup>1,2</sup>, Hao Li<sup>1,2</sup>, Yan Yang<sup>1,2</sup>, Tu-Jing Zhao<sup>1,2</sup>, Dong-Qin Yuan<sup>1,2</sup>, Wen-Liang Qian<sup>1,2,\*</sup>, Dao-Jun Cheng<sup>1,2,\*</sup>

<sup>1</sup>Integrative Science Center of Germplasm Creation in Western China (CHONGQING) Science City, Biological Science Research Center, Southwest University, Chongqing 400715, China

<sup>2</sup>State Key Laboratory of Resource Insects, Southwest University, Chongqing 400715, China

#Authors contributed equally to this work

\*Corresponding authors, E-mail: qianwl@swu.edu.cn; chengdj@swu.edu.cn

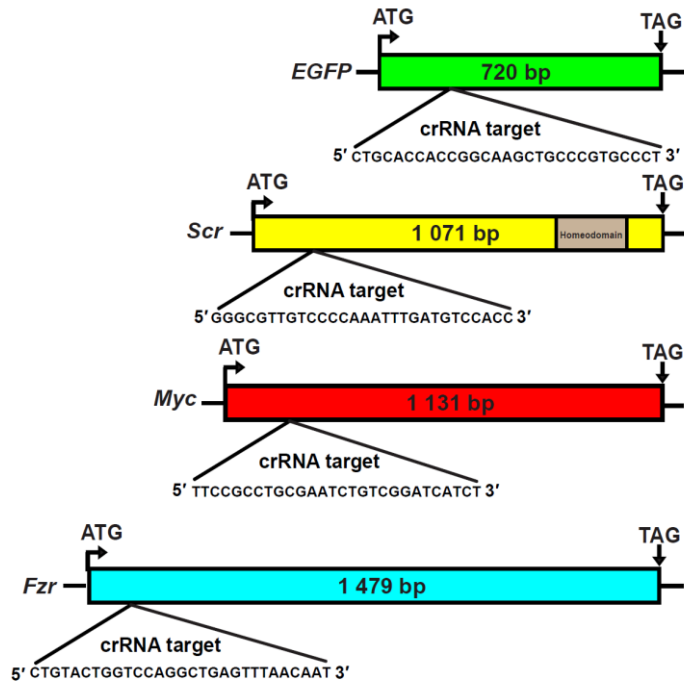

**Supplementary Figure S1. Schematic of target regions for different crRNAs in the transcripts of *EGFP*, *Scr*, *Myc*, and *Fzr***

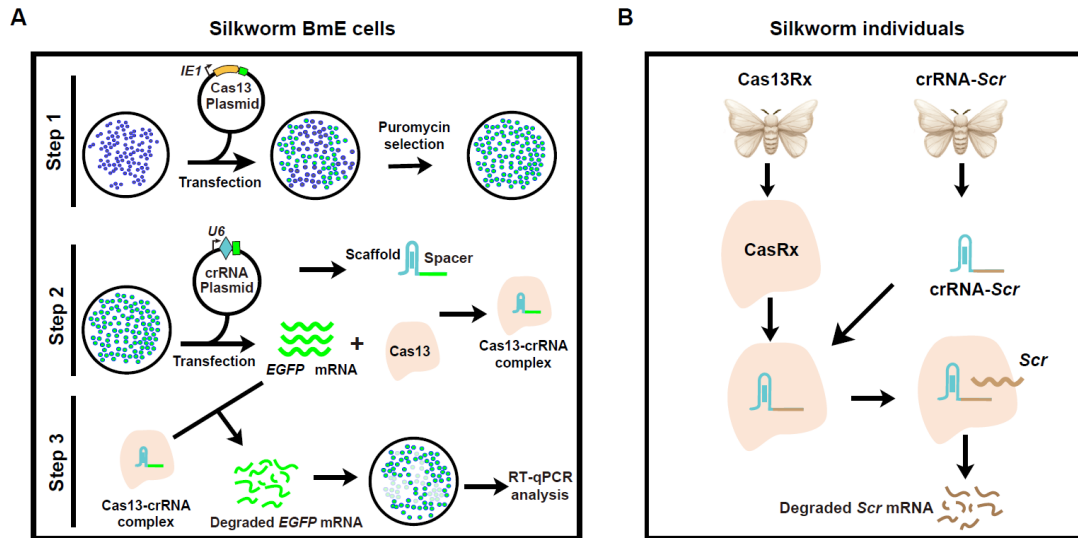

**Supplementary Figure S2. Procedures for CRISPR-Cas13-mediated RNA editing analyses in silkworm BmE cells (A) and living individuals (B)**

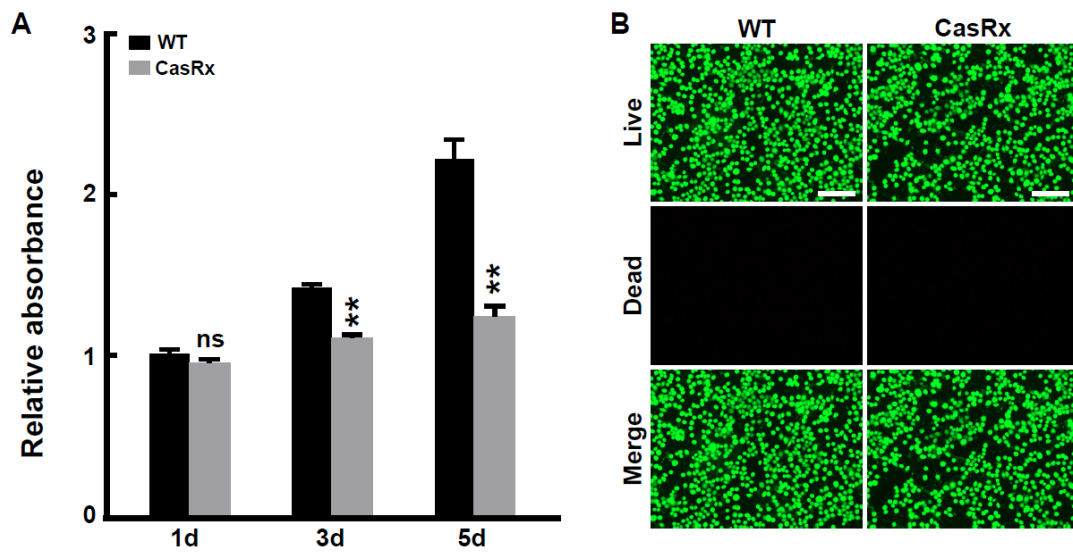

**Supplementary Figure S3. The effect of overexpressed CasRx protein on the viability of silkworm BmE cells**

A: CCK-8 assay showed that overexpressed CasRx protein moderately inhibited the proliferation of BmE cells. B: Live/Dead staining showed that no dead cell was detected following stable CasRx expression, indicating that CasRx protein had no effect on the viability of BmE cells. Scale bar, 200  $\mu\text{m}$ . Values are mean $\pm$ SE (error bars) from three independent biological replicates. d, day. Significant difference was determined using Student's *t*-test; ns: not significant; \*\*:  $P < 0.01$  versus WT as the control. WT, wild-type.

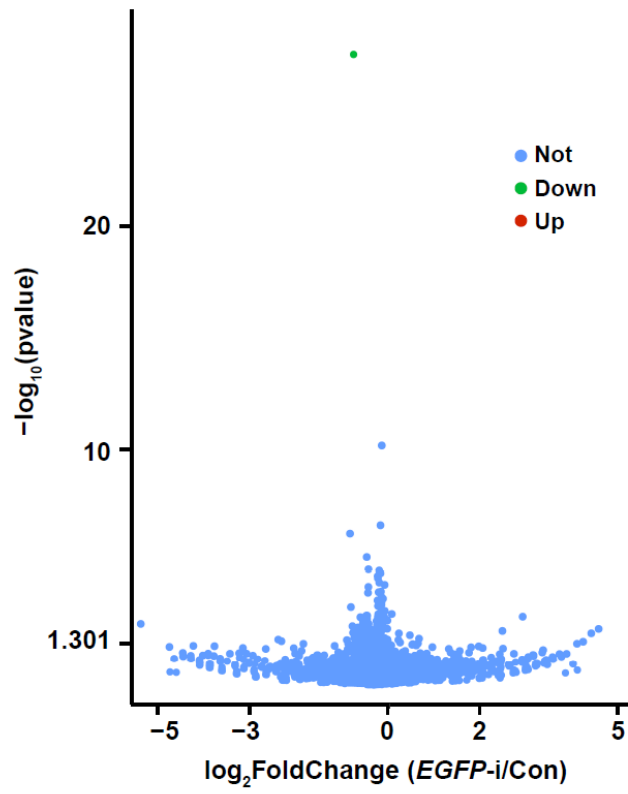

**Supplementary Figure S4. RNA-seq analysis of transcriptome change following *EGFP* knockdown in the CasRx BmE cells**

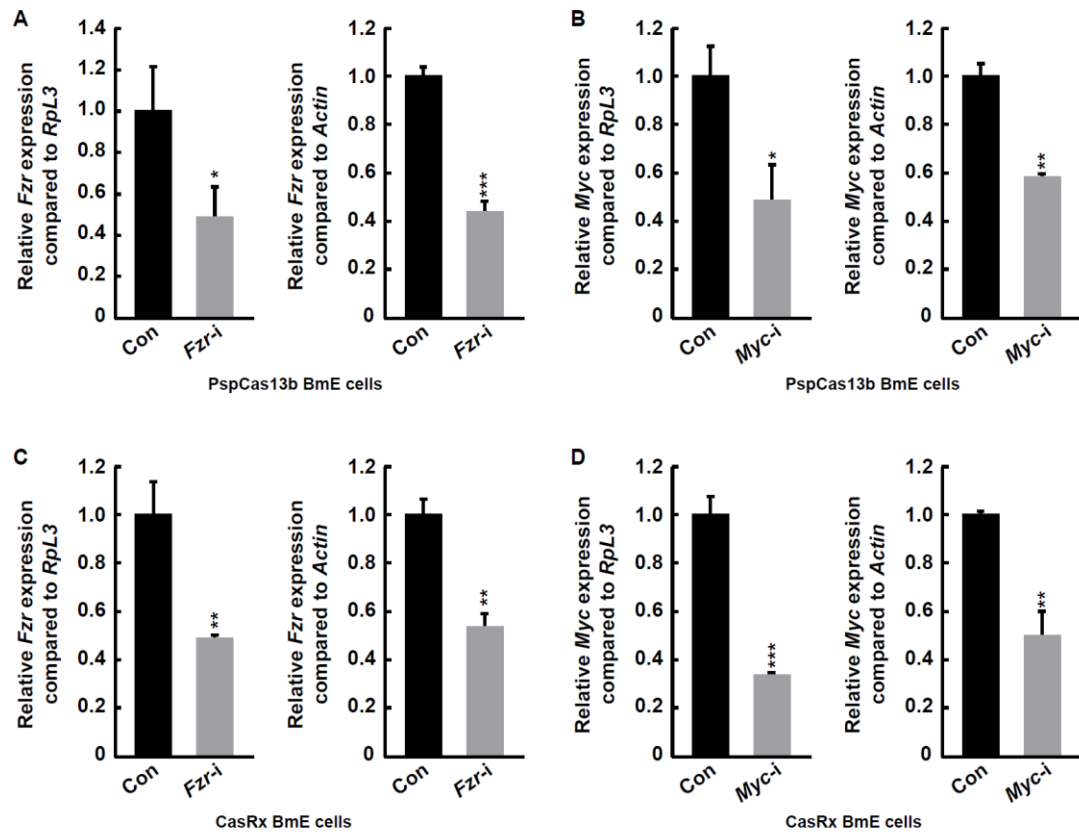

**Supplementary Figure S5. CRISPR-Cas13-mediated RNA editing of several genes in silkworm BmE cells**

A–D: RT-qPCR analysis of CRISPR-Cas13-mediated knockdown of *Fzr* and *Myc* in silkworm BmE cells. *RpL3* and *Actin* genes were used as internal controls. Values are mean±SE (error bars) from three independent biological replicates. Significant difference was determined using Student’s *t*-test; \*:  $P < 0.05$ ; \*\*:  $P < 0.01$ ; \*\*\*:  $P < 0.001$  versus the control.

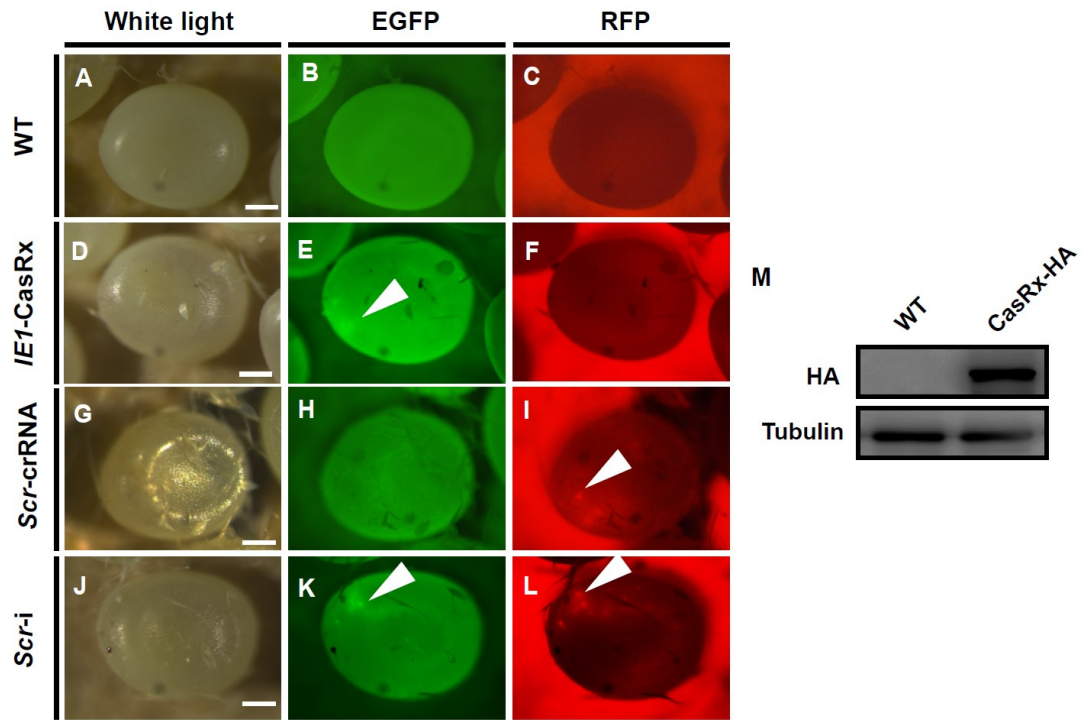

**Supplementary Figure S6. Fluorescent screening of positive transgenic silkworm strains**

A–L: Positive transgenic silkworm eggs were screened by the expression of fluorescent EGFP and DsRed (red fluorescent protein, RFP) markers in the eye driven by the  $3\times P3$  promoter. Scale bar, 0.2 mm. M: Western blotting validation of stable CasRx expression in silkworm embryo. WT, wild-type; RFP, red fluorescent protein.

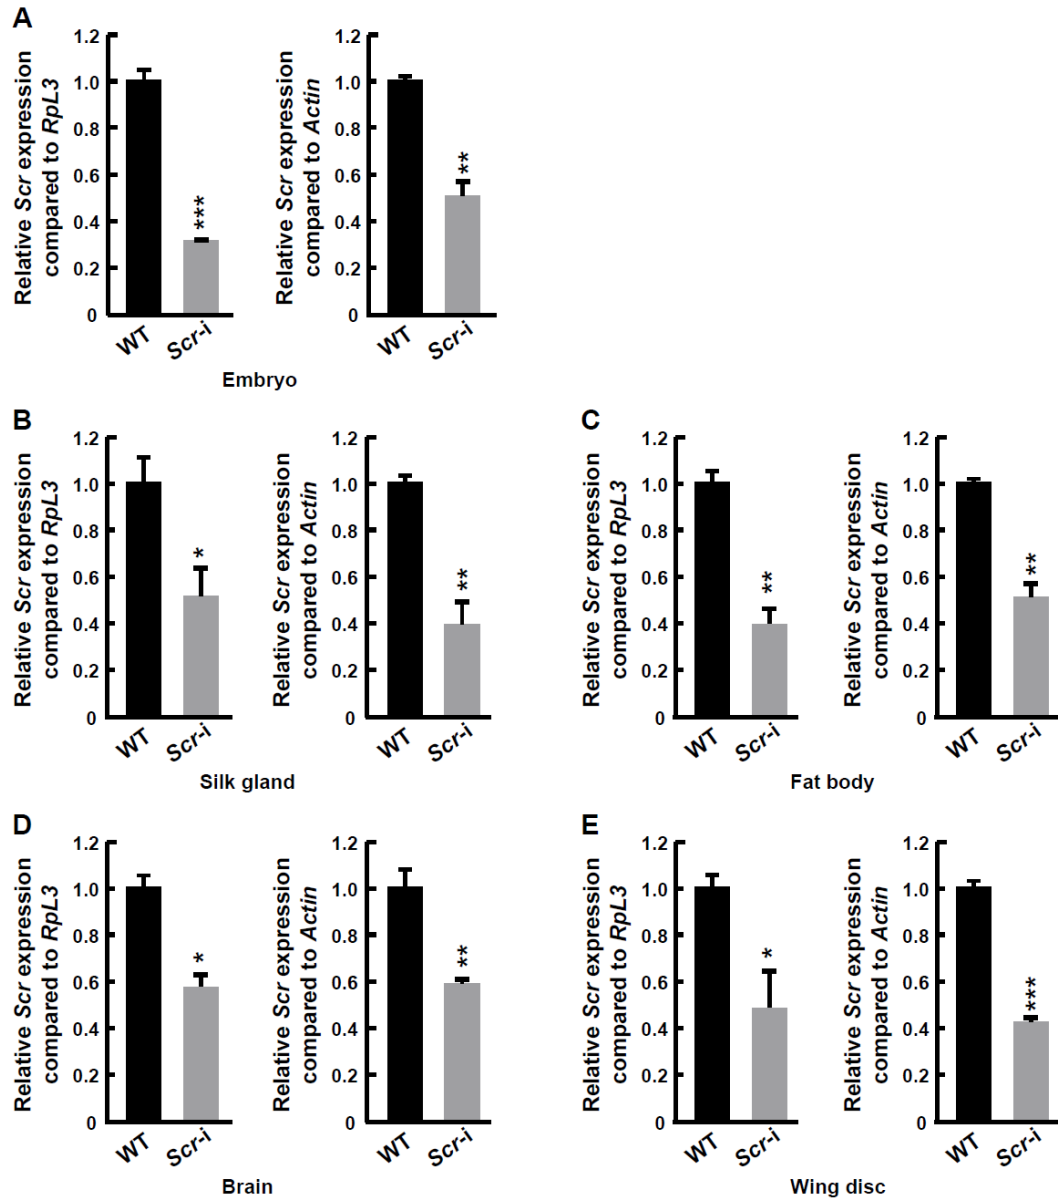

**Supplementary Figure S7. Effects of CRISPR-CasRx-mediated *Scr* knockdown on mRNA expression of *Scr***

A: CRISPR-CasRx-mediated editing of *Scr* led to the knockdown of *Scr* transcripts in silkworm embryos on the sixth day after oviposition. B–E: RT-qPCR analysis of *Scr* knockdown-induced change of *Scr* mRNA expression in several tissues from silkworm larvae on the third day of the fifth larval instar. *RpL3* and *Actin* genes were used as internal controls. Values are mean±SE (error bars) from three independent biological replicates. Significant difference was determined using Student's *t*-test, \*:  $P < 0.05$ ; \*\*:  $P < 0.01$ ; \*\*\*:  $P < 0.001$  versus WT as the control. WT, wild-type.



**Supplementary Table S1.** The primers used in this study

| <b>Purpose</b>                               | <b>Primer name</b>  | <b>Primer sequence</b>                                                                                                                                                                             |                                                                                                        |
|----------------------------------------------|---------------------|----------------------------------------------------------------------------------------------------------------------------------------------------------------------------------------------------|--------------------------------------------------------------------------------------------------------|
| Construction of the Cas13 expression plasmid | <i>IE1</i> promoter | Forward: 5' GCTTATCGATACGCGTACGGAAGCTTTTGCAGTTCGGGAC 3'<br>Reverse: 5' CCAGAGCGGGGATGTTTCATGGTAGATCCCTAGTCGTTTGGTTGTT 3'                                                                           |                                                                                                        |
|                                              | <i>U6</i> promoter  | Forward: 5' TACCATACGATGTTCCAGATTACGCT TATCCCTACGACGTGCCTGATTATGCA 3'<br>Reverse: 5' ATTCGGCCGGCCTAGGAAAAAAGTTGTAATAGCCCCTCAAACCTGGACCTTCCACAACAGATGATCCGACAGATTCGCAGGCGGAACCTGTAGAGCACGATATTTT 3' |                                                                                                        |
|                                              | <i>Cas13b</i>       | Forward: 5' GCTTATCGATACGCGTACGGTTGGCGCGCCATGAACATCCCCGCTCTGG 3'<br>Reverse: 5' TAGGCTGCCGCGTCCTTCGGTTAGGCATAGTCGGGGACATCATA 3'                                                                    |                                                                                                        |
|                                              | <i>CasRx</i>        | Forward: 5' GCTTATCGATACGCGTACGGTTGGCGCGCCATGAGCCCCAAGAAGAAGAGAAA 3'<br>Reverse: 5' TAGGCTGCCGCGTCCTTCTTATGCATAATCAGGCACGTCGTAGGGATATGCATAATCAGGCACGTCGTAGGGATAAGCGTAATCTGGAACATCGTAT 3'           |                                                                                                        |
|                                              | <i>EGFP</i>         | Forward: 5' GCTTATCGATACGCGTACGGTTGGCGCGCCGAAGGACGCGGCAGCCTACT 3'<br>Reverse: 5' TCGAATTCGGCCGGCCTAGGTTTCGATGCTAGACGATCCAGACAT 3'                                                                  |                                                                                                        |
|                                              | <i>Puro</i>         | Forward: 5' ATGGCAACCACAGTCACCACAGTTACCGGCACT 3'<br>Reverse: 5' TCAGTCCAGTACACTAAGACTATCTGCCGCCGGAACATT 3'                                                                                         |                                                                                                        |
|                                              | <i>SV40</i>         | Forward: 5' TAAAGCTTATCGATACGCGTACTTGGCGCGCCCTTCGAGCAACTTGTTTATTGCAG 3'<br>Reverse: 5' CCATTCGAATTCGGCCGGCCTATTCGATGCTAGACGATCCAGACAT 3'                                                           |                                                                                                        |
|                                              | <i>2A</i>           | Forward: 5' ATCCGGGCCCCATGCGCTTCGTATTATGCTGTACCCTGATTGCTTTGGCTGC 3'<br>Reverse: 5' CACCATGGTGGTGGGGCCCCGGATTCTCTTCGACGTCCTCCAGCCT 3'                                                               |                                                                                                        |
|                                              | CrRNA for Cas13b    | <i>EGFP</i>                                                                                                                                                                                        | Forward: 5' CAAGCTGCACCACCGGCAAGCTGCCCGTGCCT 3'<br>Reverse: 5' CAACAGGGCACGGCAGCTTGCCGGTGGTGCAG 3'     |
|                                              |                     | <i>Fzr</i>                                                                                                                                                                                         | Forward: 5' CAAGCTGTAAGTGGTCCAGGCTGAGTTTAAACAAT 3'<br>Reverse: 5' CAACATTGTTAAACTCAGCCTGGACCAGTACAG 3' |
| <i>Scr</i>                                   |                     | Forward: 5' AAACGGTCGTACCGGGACACCCGTAGAACAAC 3'<br>Reverse: 5' AAAAGTTTGTCTACGGGTGTCCCGGTACGACC 3'                                                                                                 |                                                                                                        |

---

|                    |                         |                                                                                                        |
|--------------------|-------------------------|--------------------------------------------------------------------------------------------------------|
|                    | <i>Myc</i>              | Forward: 5' CAAGTTCGCCTGCGAATCTGTCTGGATCATCT 3'<br>Reverse: 5' CAACAGATGATCCGACAGATTTCGCAGGCGGAA 3'    |
|                    | <i>RFP</i>              | Forward: 5' CAAGTCCAAGGTGTACGTGAAGCACCCCGCCGAC 3'<br>Reverse: 5' CAACGTCGGCGGGGTGCTTACGTACACCTTGGA 3'  |
| CrRNA for<br>CasRx | <i>EGFP</i>             | Forward: 5' AAACCTGCACCACCGGCAAGCTGCCCCGTGCCCT 3'<br>Reverse: 5' AAAAGAGGGCACGGGCAGCTTGCCGGTGGTGCAG 3' |
|                    | <i>Fzr</i>              | Forward: 5' AAACCTGTACTGGTCCAGGCTGAGTTTAAACAAT 3'<br>Reverse: 5' AAAAATTGTTAAACTCAGCCTGGACCAGTACAG 3'  |
|                    | <i>Scr</i>              | Forward: 5' AAACGGGCGTTGTCCCAAATTTGATGTCCACC 3'<br>Reverse: 5' AAAAGGTGGACATCAAATTTGGGGACAACGCCC 3'    |
|                    | <i>Myc</i>              | Forward: 5' AAACCTTCGCCTGCGAATCTGTCTGGATCATCT 3'<br>Reverse: 5' AAAAAGATGATCCGACAGATTTCGCAGGCGGAA 3'   |
|                    | <i>RFP</i>              | Forward: 5' AAACCTCCAAGGTGTACGTGAAGCACCCCGCCGAC 3'<br>Reverse: 5' AAAAGTCGGCGGGGTGCTTACGTACACCTTGGA 3' |
| RT-qPCR            | <i>Myc</i>              | Forward: 5' GTCGAGCACACCGTATCAGA 3'<br>Reverse: 5' AGATAAACGCTGCTGGAGGA 3'                             |
|                    | <i>Fzr</i>              | Forward: 5' TACTCGTTGTCACCCGTCAG 3'<br>Reverse: 5' GCGCTCCACAGATAGACACA 3'                             |
|                    | <i>Scr</i>              | Forward: 5' AACTCCAACCTCAAACAACACCAAG 3'<br>Reverse: 5' TCCTTTTCGAGCTCCAGCGT 3'                        |
|                    | <i>EGFP</i>             | Forward: 5' GGTGAACTTCAAGATCCGCC 3'<br>Reverse: 5' CTTGTACAGCTCGTCCATGC 3'                             |
|                    | <i>RpL3</i>             | Forward: 5' TGGCACACAAAGAAGCTACCC 3'<br>Reverse: 5' TGACCAGCACGAGCTACAGTG 3'                           |
|                    | <i>Actin</i>            | Forward: 5' AACACCCCGTCCTGCTCACTG 3'<br>Reverse: 5' GGGCGAGACGTGTGATTCCT 3'                            |
| Mutant spacer      | <i>Cas13b-EGFP-Mis3</i> | Forward: 5' CAAGAAACACCACCGGCAAGCTGCCCCGTGCCCT 3'                                                      |

---

---

|                          |                                                   |
|--------------------------|---------------------------------------------------|
|                          | Reverse: 5' CAACAGGGCACGGGCAGCTTGCCGGTGGTGTTC 3'  |
| <i>Cas13b-EGFP-Mis6</i>  | Forward: 5' CAAGCTGTTTCACCGGCAAGCTGCCCGTGCCCT 3'  |
|                          | Reverse: 5' CAACAGGGCACGGGCAGCTTGCCGGTGAAACAG 3'  |
| <i>Cas13b-EGFP-Mis9</i>  | Forward: 5' CAAGCTGCACGGGCGGCAAGCTGCCCGTGCCCT 3'  |
|                          | Reverse: 5' CAACAGGGCACGGGCAGCTTGCCGCCCCGTGCAG 3' |
| <i>Cas13b-EGFP-Mis12</i> | Forward: 5' CAAGCTGCACCACTTTCAAGCTGCCCGTGCCCT 3'  |
|                          | Reverse: 5' CAACGAGGGCACGGGCAGCTTGAAAGTGGTGCAG 3' |
| <i>Cas13b-EGFP-Mis15</i> | Forward: 5' CAAGCTGCACCACCGGGGGGCTGCCCGTGCCCT 3'  |
|                          | Reverse: 5' CAACAGGGCACGGGCAGCCCCCGGTGGTGCAG 3'   |
| <i>Cas13b-EGFP-Mis18</i> | Forward: 5' CAAGCTGCACCACCGGCAAAAAGCCCGTGCCCT 3'  |
|                          | Reverse: 5' CAACAGGGCACGGGCTTTTTGCCGGTGGTGCAG 3'  |
| <i>Cas13b-EGFP-Mis21</i> | Forward: 5' CAAGCTGCACCACCGGCAAGCTTTTCGTGCCCT 3'  |
|                          | Reverse: 5' CAACAGGGCACGAAAAGCTTGCCGGTGGTGCAG 3'  |
| <i>Cas13b-EGFP-Mis24</i> | Forward: 5' CAAGCTGCACCACCGGCAAGCTGCTTTTGCCCT 3'  |
|                          | Reverse: 5' CAACAGGGCAAAAAGCAGCTTGCCGGTGGTGCAG 3' |
| <i>Cas13b-EGFP-Mis27</i> | Forward: 5' CAAGCTGCACCACCGGCAAGCTGCCCGAAACCT 3'  |
|                          | Reverse: 5' CAACAGGTTTTCGGGCAGCTTGCCGGTGGTGCAG 3' |
| <i>Cas13b-EGFP-Mis30</i> | Forward: 5' CAAGCTGCACCACCGGCAAGCTGCCCGTGCGGG 3'  |
|                          | Reverse: 5' CAACCCCGCACGGGCAGCTTGCCGGTGGTGCAG 3'  |
| <i>CasRx-EGFP-Mis3</i>   | Forward: 5' AAACAAACACCACCGGCAAGCTGCCCGTGCCCT 3'  |
|                          | Reverse: 5' AAAAAGGGCACGGGCAGCTTGCCGGTGGTGTTC 3'  |
| <i>CasRx-EGFP-Mis6</i>   | Forward: 5' AAACCTGTTTCACCGGCAAGCTGCCCGTGCCCT 3'  |
|                          | Reverse: 5' AAAAAGGGCACGGGCAGCTTGCCGGTGAAACAG 3'  |
| <i>CasRx-EGFP-Mis9</i>   | Forward: 5' AAACCTGCACGGGCGGCAAGCTGCCCGTGCCCT 3'  |
|                          | Reverse: 5' AAAAAGGGCACGGGCAGCTTGCCGCCCCGTGCAG 3' |
| <i>CasRx-EGFP-Mis12</i>  | Forward: 5' AAACCTGCACCACTTTCAAGCTGCCCGTGCCCT 3'  |
|                          | Reverse: 5' AAAAGAGGGCACGGGCAGCTTGAAAGTGGTGCAG 3' |

---

---

|                         |                                                                                                       |
|-------------------------|-------------------------------------------------------------------------------------------------------|
| <i>CasRx-EGFP-Mis15</i> | Forward: 5' AAACCTGCACCACCGGGGGGCTGCCCCGTGCCCT 3'<br>Reverse: 5' AAAAAGGGCACGGGCAGCCCCCGGTGGTGCAG 3'  |
| <i>CasRx-EGFP-Mis18</i> | Forward: 5' AAACCTGCACCACCGGCAAAAAGCCCCGTGCCCT 3'<br>Reverse: 5' AAAAAGGGCACGGGCTTTTTGCCGGTGGTGCAG 3' |
| <i>CasRx-EGFP-Mis21</i> | Forward: 5' AAACCTGCACCACCGGCAAGCTTTTCGTGCCCT 3'<br>Reverse: 5' AAAAAGGGCACGAAAAGCTTGCCGGTGGTGCAG 3'  |
| <i>CasRx-EGFP-Mis24</i> | Forward: 5' AAACCTGCACCACCGGCAAGCTGCTTTTGCCCT 3'<br>Reverse: 5' AAAAAGGGCAAAAAGCAGCTTGCCGGTGGTGCAG 3' |
| <i>CasRx-EGFP-Mis27</i> | Forward: 5' AAACCTGCACCACCGGCAAGCTGCCCCGAAACCT 3'<br>Reverse: 5' AAAAAGGTTTCGGGCAGCTTGCCGGTGGTGCAG 3' |
| <i>CasRx-EGFP-Mis30</i> | Forward: 5' AAACCTGCACCACCGGCAAGCTGCCCCGTGCGGG 3'<br>Reverse: 5' AAAACCCGCACGGGCAGCTTGCCGGTGGTGCAG 3' |

---
